# Supplementary material for: Optimized Solid-Liquid Separation of Phenolics from Lavender Waste and Properties of the Dried Extracts
Source: Preprints.org preprint supplement (doi:10.20944/preprints202402.0172.v1), 2024-02-02

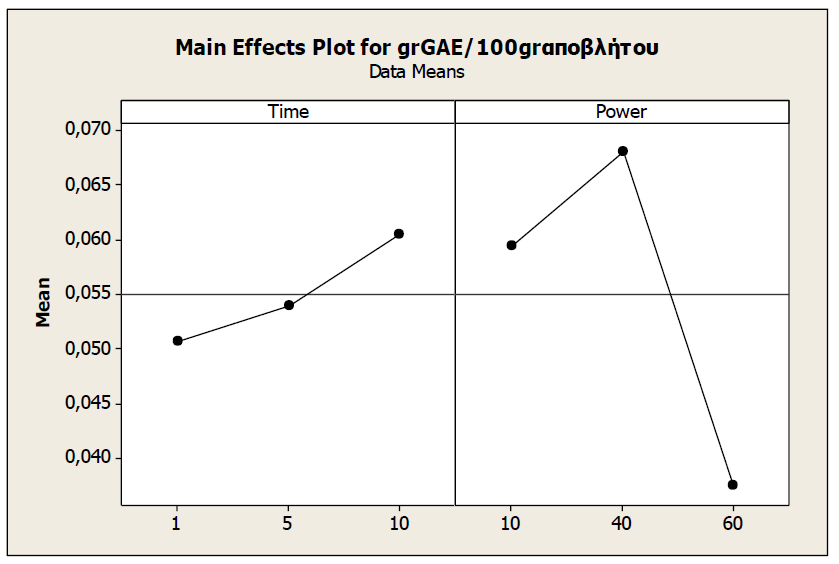

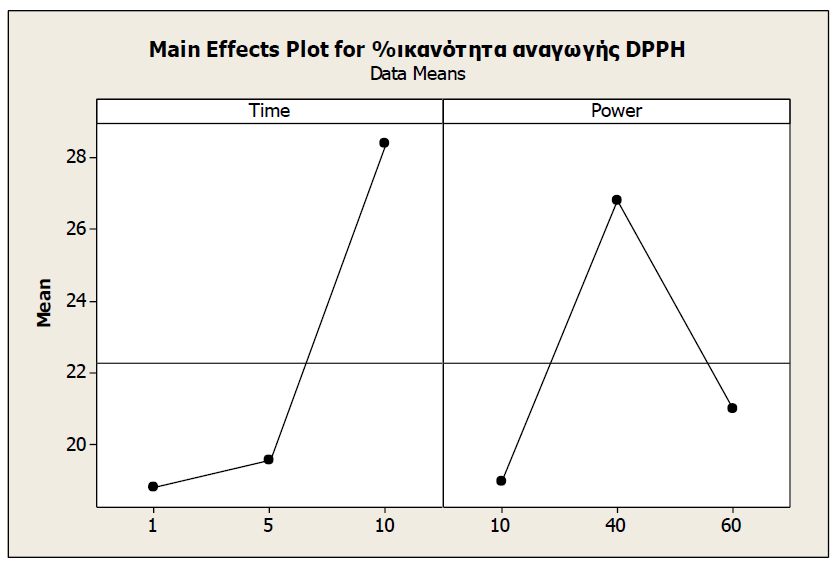


**(b)**

**(a)**


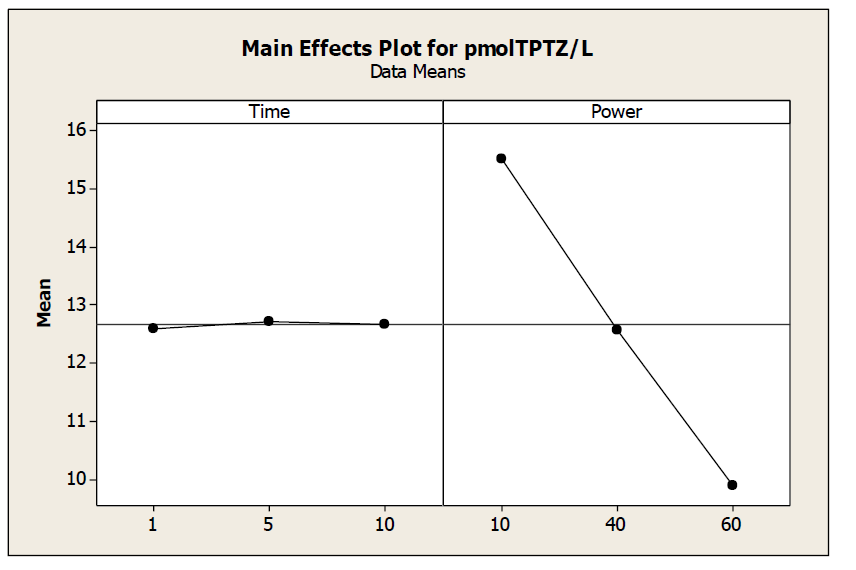


**(c)**

**Figure S1.** Main effects plots for the effect of extraction time and ultrasound amplitude on (a) total phenolic content of extract (GAE mg/g of waste), (b) antioxidant capacity of extract (DPPH, %,) (c) antioxidant capacity (FRAP, μmoles TPTZ/L).

**Table S1.** Experimental design for the UAE of lavender solid waste for two different solvents.


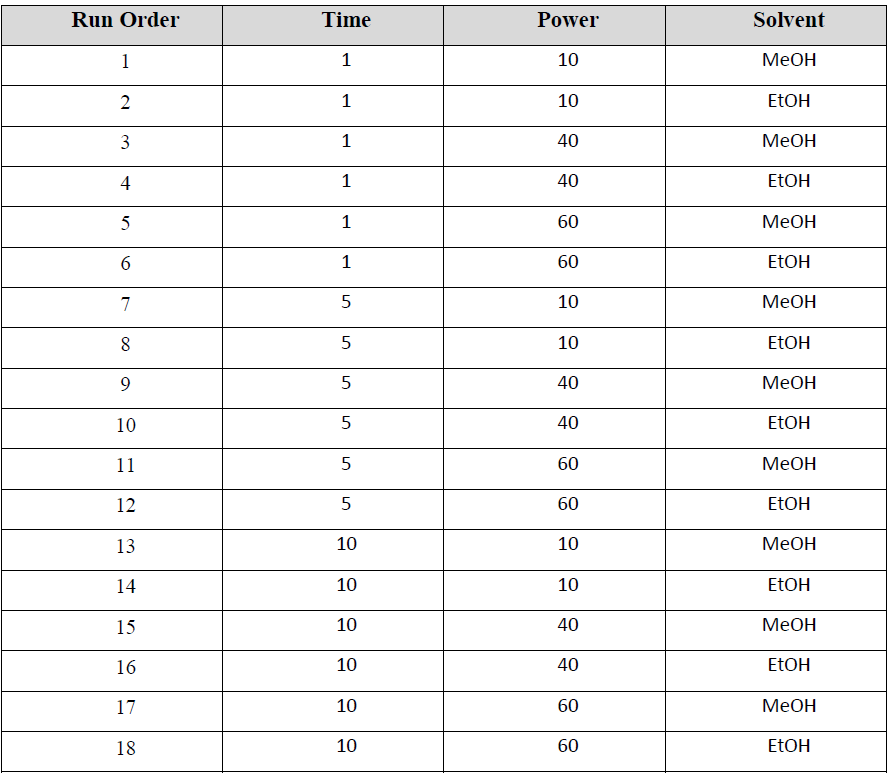

Supplement: Supplementary file 1 [file supplementary]
